# Supplementary material for: Recombinant hirudin attenuates pulmonary hypertension and thrombosis in acute pulmonary embolism rat model
Source: PeerJ. 2024 Apr 5;12:e17039. doi: 10.7717/peerj.17039 (PMC11000639; doi:10.7717/peerj.17039)
Supplement: Supplemental Information 1 [file peerj-12-17039-s001.xlsx]

## Sheet: Figure 1
Figure 1
R-hirudin reduced PAP and RVP in rats.
	mPAP (mmHg)								RVP (mmHg)
2h		Con	APE	Low	Medium	High				Con	APE	Low	Medium	High
	1	16.6377	27.6623	34.0496	24.7001	24.166			1	17.1876	42.7535	38.6339	35.8766	41.1182
	2	21.4032	48.0296	32.7233	38.0973	27.4496			2	23.9279	48.9602	46.349	40.6145	28.9485
	3	17.6132	35.569	23.9369	21.3047	27.8959			3	19.2241	45.0571	44.6002	30.8211	34.5847
	4	19.2888	31.3317	36.8286	31.1595	18.3598			4	22.5964	46.1902	35.5328	46.3698	25.6576
	5	18.8401	36.7737	37.6409	30.7028	25.6645			5	32.1738	43.7963	48.3938	39.4658	34.3294
	mPAP (mmHg)								RVP (mmHg)
6h		Con	APE	Low	Medium	High				Con	APE	Low	Medium	High
	1	25.0196	31.3457	38.3151	29.2479	34.9138			1	23.7566	36.8661	35.9438	33.9732	36.2499
	2	15.2326	36.0256	39.8735	26.748	20.5604			2	28.4178	56.0167	26.9318	29.3594	26.482
	3	24.6973	33.6476	30.0363	37.2477	30.9766			3	23.5331	47.3002	47.5621	48.626	30.2911
	4	14.5392	44.3282	22.6	30.3509	27.2322			4	20.3534	42.5849	50.9108	37.3565	22.5037
	5	24.2142	47.4198	44.0069	24.3779	18.5607			5	27.2917	46.1097	46.3096	41.4353	41.8502
	mPAP (mmHg)								RVP (mmHg)
1d		Con	APE	Low	Medium	High				Con	APE	Low	Medium	High
	1	18.1538	36.5947	29.5759	22.3244	28.9173			1	17.2478	50.3224	46.1713	43.0654	26.6386
	2	17.8576	31.7108	22.8856	27.8707	27.4778			2	24.0833	35.823	43.5476	29.3537	33.5699
	3	20.3489	41.6612	40.8195	34.2878	24.1178			3	24.766	52.9883	38.2609	40.0007	20.4259
	4	22.9815	38.9213	39.4357	28.27	26.6408			4	30.9233	36.2354	44.766	26.3117	34.5544
	5	21.8817	30.6969	32.4767	35.3195	17.9608			5	20.9339	39.0673	26.3265	36.0573	25.1863
	mPAP (mmHg)								RVP (mmHg)
4d		Con	APE	Low	Medium	High				Con	APE	Low	Medium	High
	1	17.9835	40.38	33.2994	32.8062	24.3188			1	17.3858	40.3414	40.5411	22.4701	29.2137
	2	13.9497	32.4017	27.8568	18.8715	31.2023			2	29.6433	32.3368	41.5436	30.1231	35.8126
	3	16.0044	41.0907	30.0065	35.6592	16.7262			3	29.4816	39.5566	33.2842	29.9265	22.2586
	4	22.5778	29.7142	38.3695	20.6844	15.9042			4	22.26	37.9754	26.3229	31.726	31.7845
	5	25.0154	26.5389	27.4723	28.1422	22.3391			5	31.4081	40.5188	41.0537	43.1668	18.7987

## Sheet: Figure 2
Figure 2
R-hirudin increased PaO2 but had no significant effect on PaCO2 in rats. Data were expressed as mean ± SD, n=5.
	PaO2 (mmHg)								PaCO2 (mmHg)
2h		Con	APE	Low	Medium	High				Con	APE	Low	Medium	High
	1	101.036	50.5586	72.1821	74.2492	86.9964			1	43.1136	43.1297	39.2286	45.3878	39.8134
	2	100.738	75.7042	62.6467	70.9983	73.6898			2	46.5781	47.2016	43.9197	45.7441	25.8392
	3	93.6468	69.1252	68.5003	88.0136	92.1452			3	43.3854	45.8376	40.2589	32.2621	51.6767
	4	136.977	66.5427	71.0434	81.2845	87.3634			4	46.7766	41.9102	64.857	41.1773	48.6955
	5	87.4179	71.3045	76.2314	79.3267	75.4497			5	35.9158	48.2226	39.5732	47.951	56.6269
6h	PaO2 (mmHg)								PaCO2 (mmHg)
		Con	APE	Low	Medium	High				Con	APE	Low	Medium	High
	1	109.014	54.5569	64.5985	65.2265	75.2912			1	51.661	46.8078	43.2768	57.7001	40.5994
	2	102.415	68.5274	86.069	74.4477	85.8512			2	40.1981	52.9569	37.5906	29.1759	23.2863
	3	98.3249	75.6204	72.6939	78.2389	88.78			3	48.8279	51.4325	49.0196	30.0478	45.4787
	4	89.9952	77.6415	67.5102	89.8282	78.6369			4	46.4001	39.5509	50.3968	46.0158	54.3695
	5	107.051	63.9746	77.1664	84.4469	93.9729			5	41.1449	42.5898	43.1666	54.9708	44.034
	PaO2 (mmHg)								PaCO2 (mmHg)
1d		Con	APE	Low	Medium	High				Con	APE	Low	Medium	High
	1	101.467	63.0118	89.8685	92.1273	83.0071			1	34.5048	45.6024	45.2938	42.915	54.3896
	2	104.294	66.1362	69.9201	90.9932	90.6933			2	42.6293	39.1859	53.5302	51.3908	36.9201
	3	96.7541	82.9532	86.8998	84.7554	84.1695			3	40.0302	48.2296	37.8404	43.4816	37.2491
	4	93.3693	68.846	73.3455	76.8597	89.6214			4	44.8162	35.7269	45.1807	28.8279	41.5878
	5	102.401	74.0542	69.1168	77.5441	104.945			5	44.5841	45.462	45.0075	43.9549	39.884
4d	PaO2 (mmHg)								PaCO2 (mmHg)
		Con	APE	Low	Medium	High				Con	APE	Low	Medium	High
	1	104.244	81.8622	68.8018	79.345	83.2976			1	45.4411	52.4864	37.5958	47.8634	37.705
	2	106.921	77.9781	75.0971	69.7875	102.018			2	46.1783	39.1715	46.114	35.3707	55.8014
	3	88.0948	68.9573	82.1028	84.0196	78.1902			3	46.2209	43.0923	51.8039	31.5839	54.9767
	4	104.42	57.6596	69.7	81.4277	92.6413			4	47.9788	45.8826	56.7325	40.3728	45.6346
	5	95.7971	71.3895	83.0033	82.5507	82.0477			5	46.5783	36.6547	44.2689	56.2058	40.3996

## Sheet: Figure 3
Figure 3
R-hirudin reduced MDA content, H2O2 and MPO activity, but increased SOD activity in lung tissue.
	H2O2 production (mmol/g)								SOD activity (U/mg)								MPO activity(U/g)								MDA concentration(μmol/g)
2h		Con	APE	Low	Medium	High				Con	APE	Low	Medium	High				Con	APE	Low	Medium	High				Con	APE	Low	Medium	High
	1	6.7089	11.5216	16.703	14.2677	6.9212			1	176.487	112.973	129.125	139.28	148.472			1	0.544461	1.85582	1.32645	0.900832	0.695518			1	2.55779	8.06261	4.92056	6.38466	6.04601
	2	5.79706	10.6432	8.21568	9.34055	9.93983			2	137.243	108.486	102.201	118.716	167.673			2	0.368409	1.28477	1.15347	1.04063	0.767786			2	2.41995	6.8061	6.75542	5.54899	4.37931
	3	3.5331	16.4829	12.7596	12.739	7.45412			3	196.56	102.201	106.321	157.737	160.528			3	0.481896	1.68657	1.88191	1.72977	0.746773			3	2.76562	6.12324	8.12988	4.55683	5.36901
	4	6.99516	12.0258	13.4331	8.04249	12.3376			4	131.759	146.565	155.69	147.772	128.741			4	0.521133	1.99567	1.3872	0.913883	1.08117			4	2.51838	7.49834	4.95688	5.66242	4.87815
	5	6.09224	19.0719	11.825	10.9266	9.57167			5	199.704	140.466	131.172	128.955	132.828			5	0.460536	1.48413	1.61462	1.30593	0.838956			5	2.48206	5.83718	6.04115	5.7985	4.16603
6h	H2O2								SOD								MPO								MDA
		Con	APE	Low	Medium	High				Con	APE	Low	Medium	High				Con	APE	Low	Medium	High				Con	APE	Low	Medium	High
	1	5.29959	16.1004	15.949	11.0115	13.1816			1	167.954	127.146	108.402	142.274	148.539			1	0.412962	1.89834	1.1179	1.28827	1.03668			1	2.31609	6.26126	5.72933	6.5749	5.29013
	2	6.7718	20.8079	14.2137	9.4083	9.70061			2	174.092	132.484	134.734	137.976	126.81			2	0.434378	1.62671	1.20232	0.958264	0.830249			2	2.78137	7.26279	4.96952	5.71076	4.53811
	3	6.04496	17.5106	18.3821	10.1373	7.60689			3	162.655	116.748	97.1702	146.47	161.166			3	0.508867	1.64123	1.80275	1.4528	0.744987			3	1.84131	6.2799	6.20101	5.99396	4.47329
	4	5.94594	14.9526	11.1278	12.335	7.73352			4	182.603	101.866	109.837	126.965	145.495			4	0.47152	1.28619	1.51821	1.16226	0.644529			4	2.25614	5.13785	6.44098	5.70212	5.58548
	5	7.7995	11.9187	15.0747	16.1631	8.4234			5	201.788	102.685	156.489	146.714	187.452			5	0.468444	1.49088	1.33021	0.880054	0.716672			5	2.48088	7.6198	7.36829	3.31491	4.76191
1d
	H2O2								SOD								MPO								MDA
		Con	APE	Low	Medium	High				Con	APE	Low	Medium	High				Con	APE	Low	Medium	High				Con	APE	Low	Medium	High
	1	6.22439	15.884	19.4773	14.7911	8.93179			1	192.271	81.411	140.912	128.973	174.85			1	0.389639	1.47593	1.23713	1.20656	0.693431			1	2.25743	8.02361	4.26077	5.4714	6.11942
	2	5.64049	17.3739	14.2203	11.6121	9.46998			2	168.549	114.086	117.566	139.897	143.6			2	0.372277	1.55593	1.40418	0.956671	1.094			2	2.62232	7.64335	7.72702	6.15014	4.6637
	3	6.33217	22.0906	15.8676	11.4647	8.19342			3	150.947	110.519	120.928	147.963	138.165			3	0.38178	1.27111	1.84476	1.05046	0.649835			3	2.15323	5.63124	8.1007	4.73453	4.3156
	4	7.3065	16.9208	15.0708	12.5997	11.8832			4	177.542	131.057	100.165	127.206	125.708			4	0.527585	1.9601	1.65244	1.39208	0.803205			4	2.69388	6.26287	4.9612	5.88325	5.50829
	5	6.85066	11.0436	12.4091	10.4586	7.8831			5	169.065	117.696	143.089	136.33	172.396			5	0.496699	2.02559	1.43895	1.43482	0.688256			5	2.66837	6.69246	7.0375	6.94978	5.10608
4d
	H2O2								SOD								MPO								MDA
		Con	APE	Low	Medium	High				Con	APE	Low	Medium	High				Con	APE	Low	Medium	High				Con	APE	Low	Medium	High
	1	5.55043	20.7759	11.758	14.8412	7.62863			1	177.991	142.375	136.631	132.019	142.072			1	0.494322	2.20745	1.71077	1.25495	1.06837			1	2.36747	7.92306	7.17631	6.42814	4.11545
	2	6.40887	10.1653	16.0345	9.153	8.64331			2	168.917	98.6728	141.06	145.116	189.844			2	0.439209	1.36306	1.36856	1.01643	0.513417			2	2.05342	7.04994	5.61716	5.59714	5.18116
	3	6.64476	16.1207	12.1797	11.5673	10.7657			3	145.402	103.009	134.58	115.808	100.584			3	0.452166	1.83218	1.955	1.08622	0.921275			3	2.14592	6.03802	6.15838	4.8631	6.07174
	4	6.37634	14.1865	14.2974	13.3338	8.93095			4	138.504	131.694	95.2601	111.609	136.584			4	0.41406	1.17315	1.04388	1.13084	0.655996			4	2.51448	5.84579	5.4452	6.74935	5.0583
	5	8.0824	16.7606	16.5004	14.4483	12.4286			5	194.159	110.799	118.318	151.668	143.429			5	0.537695	1.47168	1.38108	1.38963	0.629205			5	2.47699	6.40778	7.44702	5.0586	5.89159

## Sheet: Figure 4
Figure 4
R-hirudin reduced the wall area ratio and wall thickness to diameter ratio in rat pulmonary arteries.
	Wall area/tube area ratios								Wall thickness/tube diameter ratio
2h		Con	APE	Low	Medium	High				Con	APE	Low	Medium	High
	1	0.696823	0.675062	0.705758	0.81254	0.470471			1	0.306107	0.329982	0.291624	0.2777	0.340211
	2	0.555182	0.671459	0.639842	0.672377	0.72987			2	0.382271	0.263029	0.315262	0.297454	0.296005
	3	0.749057	0.71465	0.652079	0.678984	0.8106			3	0.291698	0.351683	0.338833	0.374813	0.336423
	4	0.597178	0.627096	0.617804	0.558598	0.470243			4	0.206295	0.366965	0.428827	0.314778	0.355998
	5	0.633735	0.666737	0.740053	0.497868	0.638703			5	0.328229	0.353112	0.330852	0.36585	0.359749
6h		Con	APE	Low	Medium	High				Con	APE	Low	Medium	High
	1	0.58409	0.712924	0.734091	0.66056	0.523385			1	0.320629	0.453405	0.320148	0.310299	0.354451
	2	0.605729	0.636154	0.742709	0.69445	0.612958			2	0.321641	0.417737	0.339231	0.409738	0.296449
	3	0.572791	0.675429	0.656958	0.699393	0.667173			3	0.342814	0.337009	0.366134	0.330604	0.270381
	4	0.630622	0.873707	0.577376	0.728876	0.741403			4	0.264409	0.305087	0.396784	0.404003	0.383233
	5	0.790741	0.67745	0.821406	0.628036	0.735681			5	0.252143	0.32394	0.377422	0.319325	0.345665
1d		Con	APE	Low	Medium	High				Con	APE	Low	Medium	High
	1	0.568077	0.709175	0.818229	0.721554	0.726844			1	0.342443	0.379317	0.456168	0.337458	0.351923
	2	0.539333	0.682756	0.731822	0.650262	0.670628			2	0.33176	0.511311	0.452129	0.418102	0.31346
	3	0.819408	0.819338	0.737561	0.834113	0.611085			3	0.251353	0.411476	0.356261	0.437817	0.408235
	4	0.639373	0.864482	0.841181	0.764874	0.704004			4	0.273499	0.426082	0.405193	0.44264	0.346565
	5	0.538866	0.740107	0.620361	0.639273	0.626925			5	0.224559	0.42333	0.406119	0.329174	0.286625
4d		Con	APE	Low	Medium	High				Con	APE	Low	Medium	High
	1	0.631033	0.750039	0.819864	0.710063	0.809536			1	0.338818	0.553357	0.389322	0.390499	0.341783
	2	0.596756	0.900057	0.728781	0.680966	0.61102			2	0.276871	0.394663	0.461212	0.473782	0.359907
	3	0.487349	0.889891	0.961459	0.812084	0.656446			3	0.298333	0.5169	0.443146	0.400001	0.467926
	4	0.716745	0.745561	0.730351	0.733705	0.625178			4	0.310499	0.46639	0.534211	0.428521	0.329396
	5	0.729109	0.827651	0.731641	0.702948	0.647611			5	0.31951	0.486425	0.474718	0.467292	0.41661

## Sheet: Figure 5
Figure 5
R-hirudin decreased the levels of ET-1 and TXB2, but increased 6-K-PGF1α and NO levels in rat serum.
		ET-1 (ng/L)								TXB2 (ng/L)								6-K-PGF1а (ng/L)								NO (μmol/L)
	2h		Con	APE	Low	Medium	High				Con	APE	Low	Medium	High				Con	APE	Low	Medium	High				Con	APE	Low	Medium	High
		1	31.7118	53.4106	53.143	44.173	45.9995			1	36.3817	61.3116	64.6507	53.3598	47.1004			1	79.9054	45.0233	43.4973	53.5092	52.4949			1	8.49725	5.61484	4.0414	5.97056	6.71864
		2	45.1036	40.8672	51.4507	49.7135	41.0616			2	42.2352	52.4171	51.8492	49.6671	56.8015			2	67.359	49.4223	43.2311	54.2772	62.5628			2	6.89378	4.06492	4.65935	4.16763	6.26963
		3	29.783	47.2305	51.3307	37.1722	44.2441			3	40.5727	70.1916	58.2361	56.6632	50.7885			3	78.3326	44.9478	51.3235	43.3576	55.6871			3	8.69384	5.28459	6.17479	5.31791	7.79279
		4	38.2112	58.3531	49.6866	53.324	41.3713			4	40.4556	63.4145	66.0519	46.7536	45.9719			4	59.8882	39.7298	49.6497	63.674	48.1587			4	7.77834	4.74371	5.14496	7.30624	5.69997
		5	30.1536	63.5169	49.9043	49.7859	41.4943			5	31.3073	60.4713	54.5077	54.4584	40.4125			5	61.0544	41.1103	46.0422	45.1927	71.8229			5	7.75425	3.99505	4.98313	5.58398	5.45757
			Con	APE	Low	Medium	High				Con	APE	Low	Medium	High				Con	APE	Low	Medium	High				Con	APE	Low	Medium	High
	6h	1	27.0847	58.3209	44.2532	50.9464	51.0238			1	32.6532	68.3319	63.2674	54.8388	46.5775			1	68.5812	50.5042	44.1741	45.6534	59.7923			1	7.09873	4.72136	4.03419	5.42466	6.06511
		2	33.1064	44.3033	49.472	41.6383	40.473			2	46.9277	57.1681	55.8101	57.823	49.3546			2	80.2618	40.4531	46.843	57.6506	57.7829			2	8.17636	3.81476	5.04186	4.96026	7.06714
		3	38.7292	62.6194	61.1347	42.7324	40.8901			3	40.1384	66.7225	61.5805	48.812	57.8999			3	64.1414	38.9132	39.9579	51.0923	64.3811			3	9.22707	4.17808	4.1583	4.57534	4.89431
		4	31.9782	56.0781	58.1961	53.8426	40.8483			4	37.1024	58.2081	63.5581	65.6068	51.0887			4	59.2611	38.7743	48.667	52.7531	52.6093			4	6.74295	3.77305	6.16098	6.89241	5.76129
		5	39.752	65.2018	54.2534	45.4749	43.0545			5	42.7138	76.4953	64.2249	59.0688	56.0612			5	72.958	41.0842	40.5019	47.05	45.4727			5	8.87358	5.25559	5.21095	6.18011	6.68741
			Con	APE	Low	Medium	High				Con	APE	Low	Medium	High				Con	APE	Low	Medium	High				Con	APE	Low	Medium	High
		1	40.2267	52.1877	47.0096	53.963	44.9738			1	43.6598	68.5204	68.2334	58.274	49.2804			1	68.3306	45.7745	44.4995	60.9222	68.7972			1	7.47553	4.03641	6.11659	4.76421	4.91727
	1d	2	29.0742	55.0324	69.3619	50.0282	44.1874			2	40.3988	55.1004	62.8455	51.1381	53.2107			2	63.1906	40.8144	52.9744	47.3581	57.705			2	9.09375	4.61352	4.28342	5.42679	6.69016
		3	27.4533	63.0309	49.6663	46.4708	52.7484			3	48.3568	65.9012	46.0003	60.9532	45.0027			3	82.7205	48.9085	56.8611	45.5065	58.7405			3	6.29859	5.19745	5.2463	6.49963	5.60295
		4	29.5875	57.3784	50.1542	48.2677	44.0528			4	35.8376	72.3792	65.6847	56.8941	49.7111			4	63.3219	37.5852	34.3687	54.6388	63.5296			4	9.16243	4.04139	4.72118	7.27543	7.25223
		5	33.4026	56.2251	49.4139	53.5259	45.0144			5	36.8925	55.3016	65.4839	53.4277	51.3926			5	62.972	47.1305	50.8599	62.3062	46.8598			5	6.755	5.34234	5.5635	5.67619	7.22654
			Con	APE	Low	Medium	High				Con	APE	Low	Medium	High				Con	APE	Low	Medium	High				Con	APE	Low	Medium	High
		1	19.6832	50.606	61.3327	49.8396	44.0387			1	46.8498	57.5115	53.1953	56.7888	53.7323			1	69.4478	41.4489	47.5837	52.7586	54.8541			1	8.40315	5.03668	5.28557	5.17989	6.16859
		2	35.6794	57.7991	50.8065	42.7913	42.8711			2	38.3032	54.1173	62.1708	45.0893	52.4188			2	63.3012	55.4977	49.1464	47.9517	67.1939			2	9.67548	4.33195	5.47762	6.43856	5.0202
	4d	3	36.4326	62.3304	55.493	47.7097	45.616			3	42.9211	66.6657	62.5528	58.0181	33.6704			3	75.0924	43.6984	47.2307	64.7007	58.7614			3	7.57328	3.66941	4.34255	5.27301	6.49798
		4	39.1205	49.5192	49.8972	43.3632	48.1574			4	36.265	61.7816	56.3643	56.0612	49.9953			4	67.8067	40.5212	42.3445	55.6669	51.5216			4	6.96206	5.30746	4.61902	3.53052	7.27823
		5	31.7176	56.3435	45.7605	53.2313	38.6959			5	37.6175	71.1961	54.2966	46.2943	40.7753			5	77.5285	51.2409	60.626	55.0272	61.6519			5	6.57	4.61194	5.20833	6.31884	5.33805

## Sheet: Figure 6
Figure 6
R-hirudin ameliorated histopathological changes in lung tissue (400×, bar=50 µm).

## Sheet: Figure 7
Figure 7
R-hirudin reduced apoptosis in lung tissue (200×, bar=50 µm).
	Total Cell Count
		Con	APE	Low	Medium	High
	1	87	214	146	185	123
	2	120	265	174	137	120
	3	118	178	197	171	152
	Apoptotic Cell Count
		Con	APE	Low	Medium	High
	1	3	42	17	15	8
	2	5	66	29	10	6
	3	4	27	26	21	9
	Cell Positivity (%)
		Con	APE	Low	Medium	High
	1	3.44828	19.6262	11.6438	8.10811	6.50407
	2	4.16667	24.9057	16.6667	7.29927	5
	3	3.38983	15.1685	13.198	12.2807	5.92105

## Sheet: Figure 8
Figure 8
R-hirudin reduced the expression of MMP9 and VCAM-1 in lung tissue (200×, bar=100 µm; 400×, bar=50 µm).
	area of MMP9								area of VACM1
		Con	APE	Low	Medium	High				Con	APE	Low	Medium	High
	1	586095	240977	416073	124799	88563			1	91241	45692	357060	95496	51249
	2	189473	290623	358679	431925	117297			2	106959	205352	467333	108679	303508
	3	195186	183381	234427	86390	175512			3	309803	365219	313835	111782	39255
	IOD of MMP9								IOD of VACM1
		Con	APE	Low	Medium	High				Con	APE	Low	Medium	High
	1	187316	178405	189315	60679.5	27138.5			1	26558.2	29216.6	195405	43865.4	18237.4
	2	61559.4	169146	194452	183876	31572.2			2	39412	126045	225975	45541.7	95410
	3	70008.6	112755	124008	43322.6	47164.1			3	94870.5	199609	193330	56783.6	15327
	AOD of MMP9								AOD of VACM1
		Con	APE	Low	Medium	High				Con	APE	Low	Medium	High
	1	0.3196	0.740341	0.455005	0.486218	0.306431			1	0.291077	0.639425	0.547262	0.459343	0.355859
	2	0.324898	0.582011	0.542133	0.425713	0.269164			2	0.368478	0.6138	0.483542	0.419048	0.314357
	3	0.358676	0.61487	0.528981	0.501477	0.268723			3	0.306228	0.546545	0.616026	0.507985	0.390448
MMP9
VACM1
VVAM-1

## Sheet: Figure 9
Figure 9
R-hirudin reduced the protein expression of p-ERK1/2/ERK1/2 and p-P65/P65 in lung tissue.
Protein	Con	APE	Low	Medium	High
β-actin	29585.1	28079	26941.9	25740.7	26665.4
β-actin	28344.3	27200.3	27049.4	26152.8	26379.9
β-actin	23178.3	23172.3	23881.1	23584.1	25350.9
Protein	Con	APE	Low	Medium	High
ERK1/2	22441.1	21729.6	21783.6	22631.2	24205.7
ERK1/2	24580.3	22674.6	20937.7	23133.9	25238.1
ERK1/2	22590.1	24267.7	23886.9	23666.2	24979.1
β-actin	29585.1	28079	26941.9	25740.7	26665.4
β-actin	28344.3	27200.3	27049.4	26152.8	26379.9
β-actin	23178.3	23172.3	23881.1	23584.1	25350.9
ERK1/2/β-actin	0.758528	0.773875	0.80854	0.8792	0.907758
ERK1/2/β-actin	0.867207	0.833618	0.774054	0.884566	0.956717
ERK1/2/β-actin	0.974622	1.04727	1.00024	1.00348	0.985333
Protein	Con	APE	Low	Medium	High
p-ERK1/2	5783.37	24748	19383.3	11675.1	6146.15
p-ERK1/2	6867.9	21205.1	17397.8	11568.9	9261.97
p-ERK1/2	5554.42	20521.6	21602.6	15044.4	12063.7
ERK1/2	22441.1	21729.6	21783.6	22631.2	24205.7
ERK1/2	24580.3	22674.6	20937.7	23133.9	25238.1
ERK1/2	22590.1	24267.7	23886.9	23666.2	24979.1
p-ERK1/2/ERK1/2	0.257713	1.13891	0.889812	0.515887	0.253913
p-ERK1/2/ERK1/2	0.279406	0.93519	0.83093	0.500083	0.366984
p-ERK1/2/ERK1/2	0.245878	0.845633	0.904369	0.635693	0.482953
Protein	Con	APE	Low	Medium	High
P65	21459.8	24261.3	25247	23790.1	23446.9
P65	23629.5	23465.7	22053.3	21176.9	19686.7
P65	20702.2	22692.6	19809	18744.4	15612.4
β-actin	29585.1	28079	26941.9	25740.7	26665.4
β-actin	28344.3	27200.3	27049.4	26152.8	26379.9
β-actin	23178.3	23172.3	23881.1	23584.1	25350.9
P65/β-actin	0.725358	0.864039	0.937089	0.924222	0.879299
P65/β-actin	0.833661	0.8627	0.815295	0.809738	0.746276
P65/β-actin	0.893172	0.979298	0.829483	0.794788	0.615851
Protein	Con	APE	Low	Medium	High
p-P65	2581.88	24075.4	12067.4	7566.44	4812.02
p-P65	3073.71	23260.2	10739.3	7705.44	3266.07
p-P65	3542.02	26967.5	13496.3	8113.39	4430.42
P65	21459.8	24261.3	25247	23790.1	23446.9
P65	23629.5	23465.7	22053.3	21176.9	19686.7
P65	20702.2	22692.6	19809	18744.4	15612.4
p-P65/P65	0.120312	0.992336	0.477976	0.31805	0.205231
p-P65/P65	0.130079	0.991242	0.486972	0.36386	0.165903
p-P65/P65	0.171094	1.18838	0.681321	0.432844	0.283776
