# Supplementary material for: Recombinant hirudin attenuates pulmonary hypertension and thrombosis in acute pulmonary embolism rat model
Source: PeerJ journal article supplement (doi:10.7717/peerj.17039), 2024-04-05

$\beta$ -actin

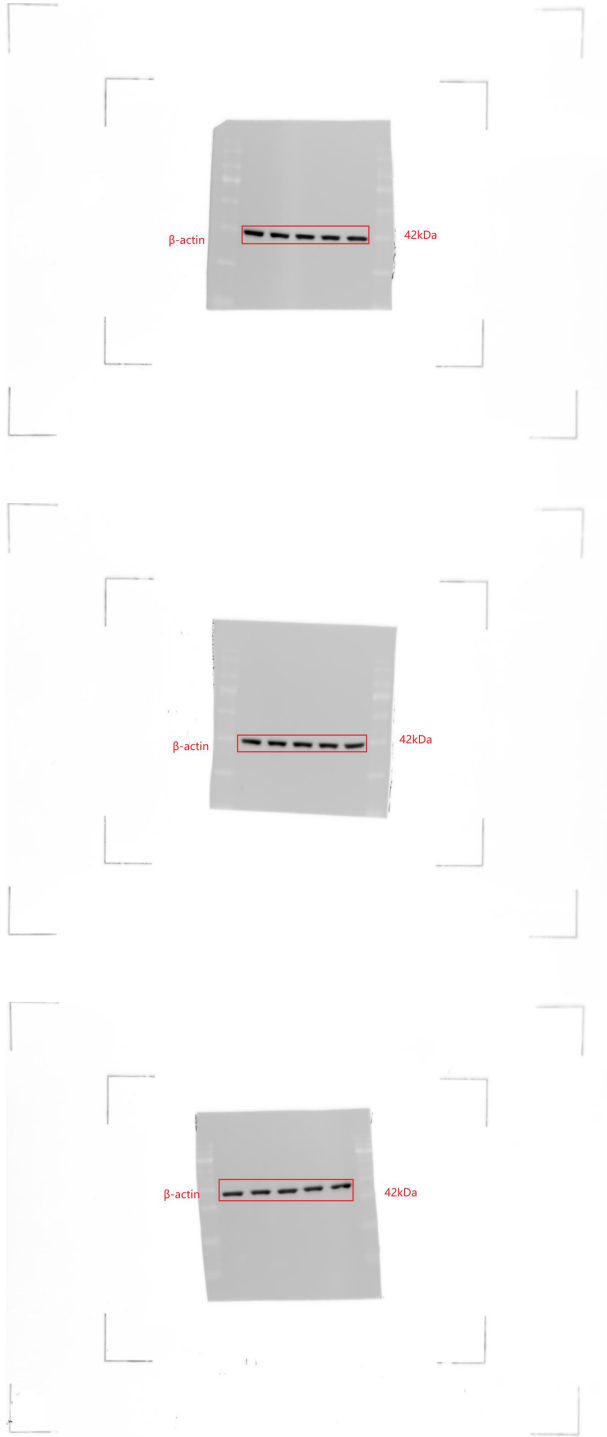

ERK

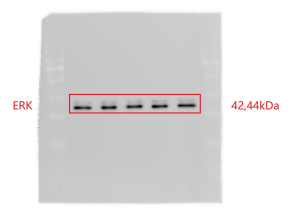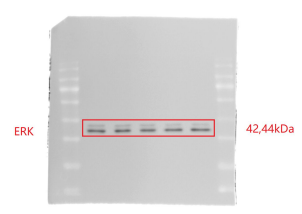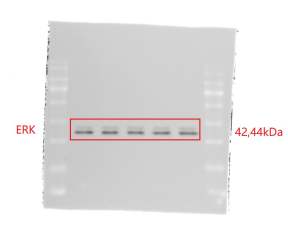

p-ERK

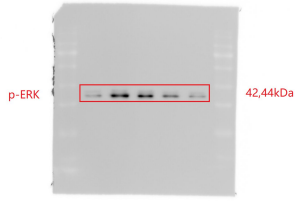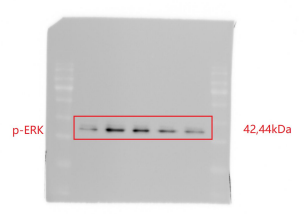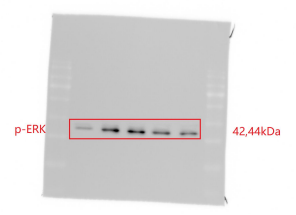

P65

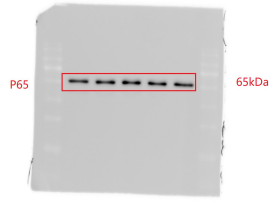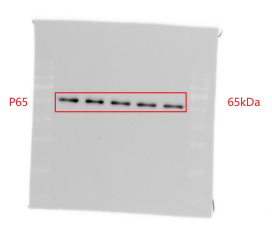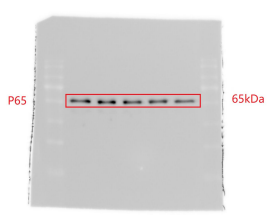

P-p65

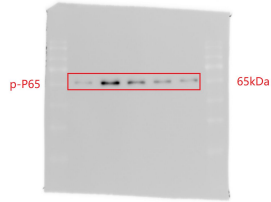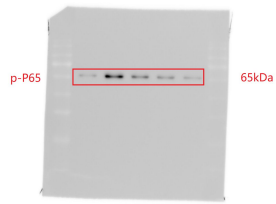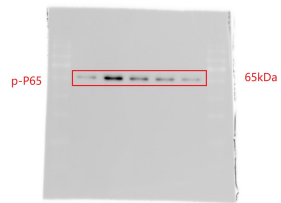

Supplement: Western_blot.pdf [file Western_blot.pdf]
